# Supplementary material for: Immunoglobulin gene rearrangement IGHV3-48 is a predictive marker of histological transformation into aggressive lymphoma in follicular lymphomas
Source: PubMed Central journal article supplement (PMC6579759; doi:10.1038/s41408-019-0213-9), 2019-06-17

Supplementary Figure 1. Flowchart of training cohort.

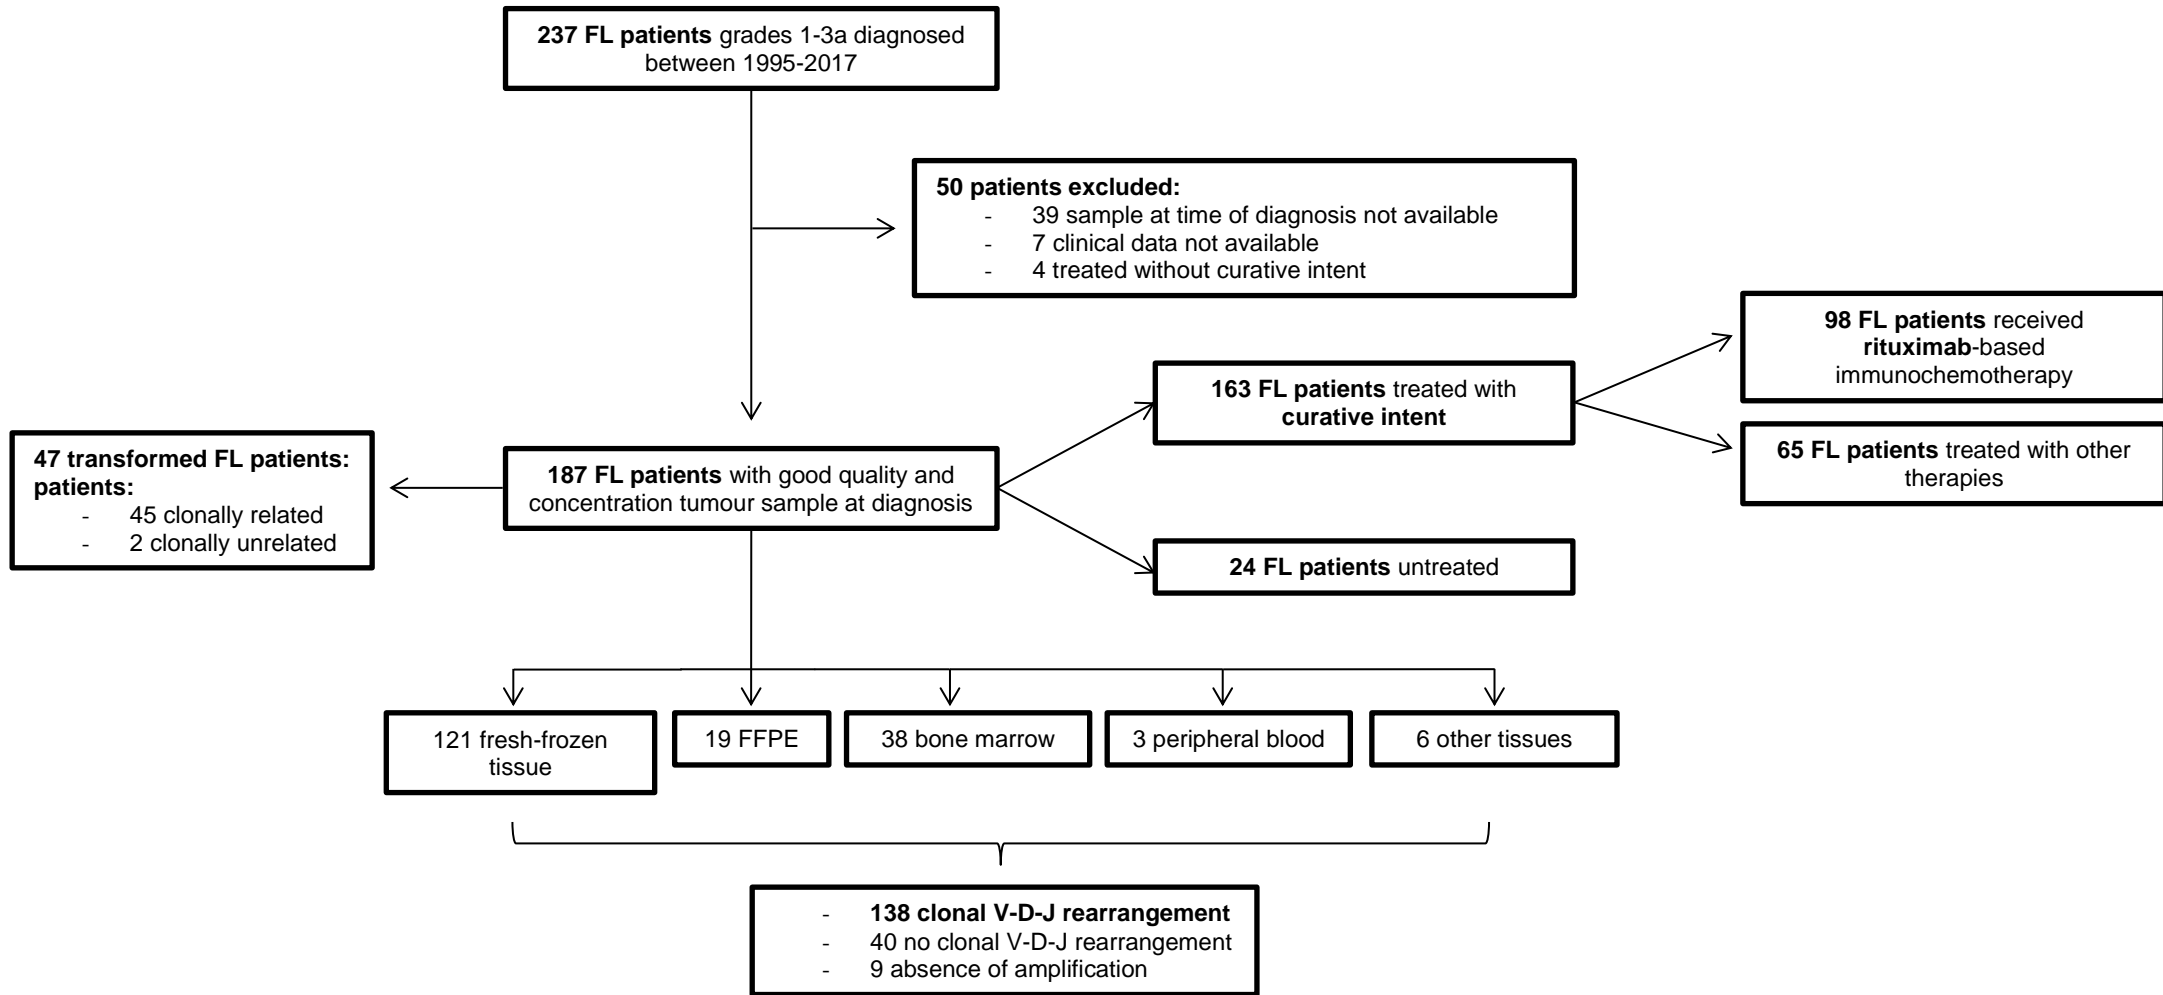

**Supplementary Figure 2.** (A) Homology of IGHV genes in training cohort. The boxplot shows percentage of homology according to IGHV subgroup in 130 sequences obtained from 138 patients studied. Horizontal lines represent median percentage of homology for the IGHV subgroup. (B) Unmutated (>98% homology) and mutated (<98% homology) frequency according to IGHV subgroup in 130 sequences studied.

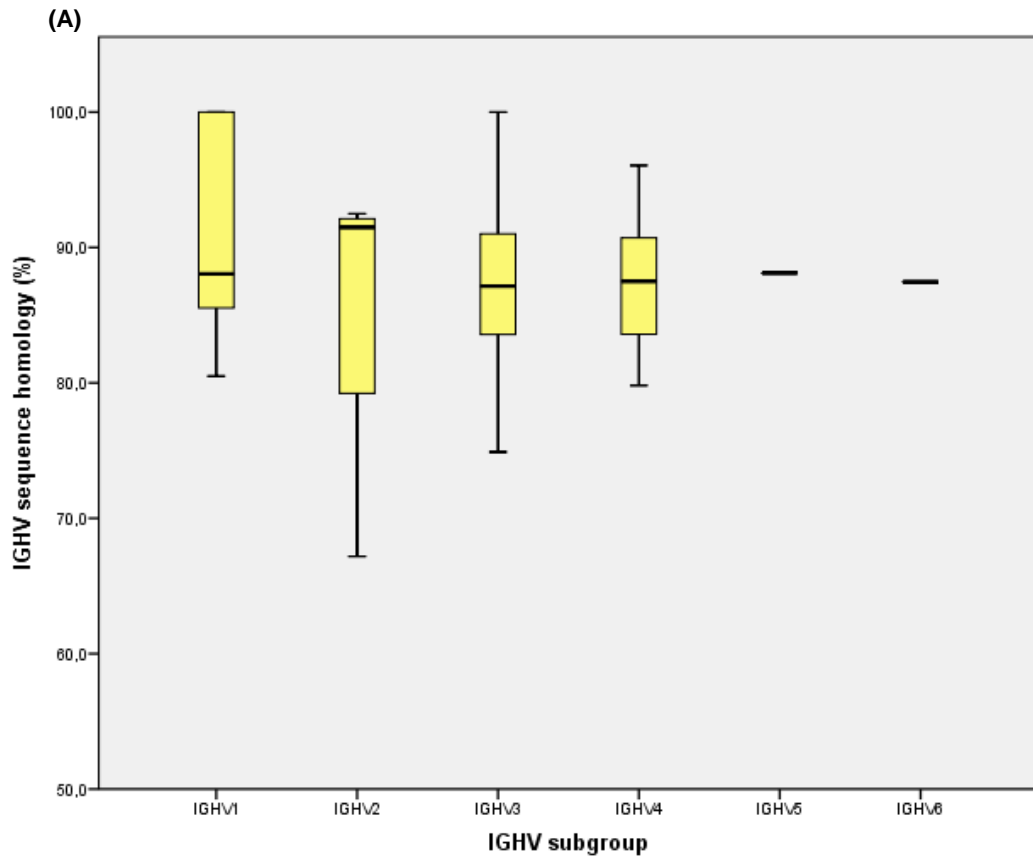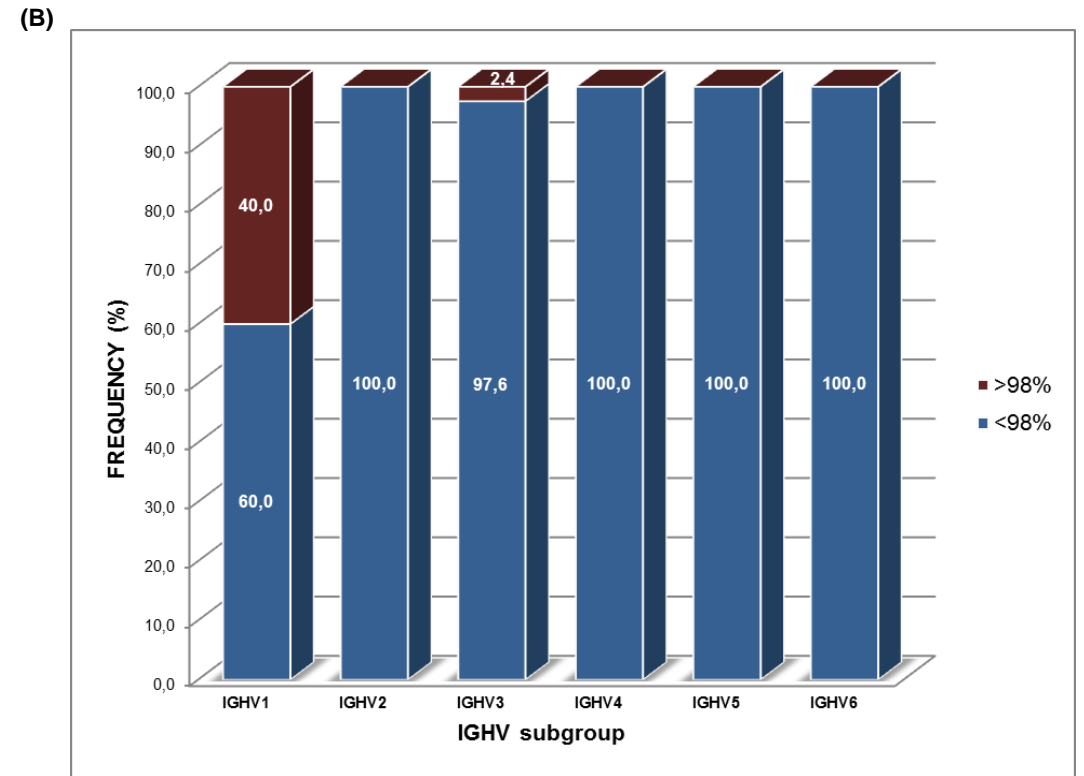

**Table S1.** Clinical characteristics of FL series included (larger cohort, n=187) vs. FL patients with clonal IGH rearrangements available (study cohort, n=138).

| Variable                                | Larger cohort<br>n (%) | Study cohort<br>n (%) | P  |
|-----------------------------------------|------------------------|-----------------------|----|
| <b>Age, years (median, range)</b>       | 58 (19-87)             | 59 (19-87)            | ns |
| <b>Sex F/M</b>                          | 99 (53)/88 (47)        | 79 (57)/59 (43)       | ns |
| <b>Histological grade*</b>              |                        |                       |    |
| I                                       | 84 (48.8)              | 60 (44.8)             | ns |
| II                                      | 67 (39)                | 58 (43.3)             | ns |
| IIIA                                    | 21 (12.2)              | 12 (9.0)              | ns |
| <b>FLIPI*</b>                           |                        |                       |    |
| 0-1 (Low risk)                          | 49 (32.9)              | 32 (27.4)             | ns |
| 2 (Intermediate risk)                   | 46 (30.9)              | 39 (33.3)             | ns |
| 3-5 (High risk)                         | 54 (36.2)              | 46 (39.3)             | ns |
| <b>Ann Arbor*</b>                       |                        |                       |    |
| I                                       | 24 (14.2)              | 12 (9.2)              | ns |
| II                                      | 18 (10.7)              | 13 (10.0)             | ns |
| III                                     | 18 (10.7)              | 14 (10.8)             | ns |
| IV                                      | 109 (64.5)             | 91 (70.0)             | ns |
| <b>First-line therapy</b>               |                        |                       |    |
| Never treated                           | 24 (12.8)              | 16 (11.6)             | ns |
| Rituximab-based ICT                     | 98 (52.4)              | 80 (58.0)             | ns |
| R-CHOP                                  | 68 (69.4)              | 53 (66.3)             | ns |
| R-Bendamustine                          | 11 (11.2)              | 8 (10.0)              | ns |
| R-CVP                                   | 3 (3.1)                | 3 (3.7)               | ns |
| Others                                  | 16 (16.3)              | 16 (20.0)             | ns |
| CT without rituximab                    | 48 (25.7)              | 34 (24.6)             | ns |
| CHOP                                    | 35 (72.9)              | 25 (73.5)             | ns |
| Fludarabine-based                       | 3 (6.3)                | 2 (5.9)               | ns |
| Others                                  | 10 (20.8)              | 7 (20.6)              | ns |
| Radiotherapy alone or with rituximab    | 13 (7)                 | 6 (4.3)               | ns |
| Rituximab alone                         | 4 (2.1)                | 2 (1.4)               | ns |
| <b>Maintenance with rituximab*</b>      | 73 (39)                | 60 (54.1)             | ns |
| <b>Response after induction therapy</b> |                        |                       |    |
| CR                                      | 87 (53.7)              | 61 (50.4)             | ns |
| PR                                      | 63 (38.9)              | 51 (42.1)             | ns |
| NR/Failure                              | 12 (7.4)               | 9 (7.4)               | ns |

\***Larger cohort:** Histological grade was available for 172 (92%) patients; FLIPI was available for 149 (80%) patients; Ann Arbor was available for 169 (90%) patients; Maintenance was calculated for 147 (79%) patients.

**Study cohort:** Histological grade was available for 130 (94%) patients; FLIPI was available for 117 (85%) patients; Ann Arbor was available for 130 (94%) patients; Maintenance was calculated for 111 (80%) patients.

ICT: Immunochemotherapy; R, rituximab; CHOP, cyclophosphamide/doxorubicin/vincristine/prednisone; CVP, cyclophosphamide/vincristine/prednisone; QT: Chemotherapy; CR: Complete response; PR: Partial response; NR: No response; FLIPI: FL International Prognosis Index.

**Table S2.** Frequencies of IGHV, IGHD and IGHJ subgroups in the clonal V-D-J rearrangements of follicular lymphoma.

| IGH subgroup  | Frequency, n | Frequency, % |
|---------------|--------------|--------------|
| IGHV1         | 7            | 5,1          |
| IGHV2         | 4            | 2,9          |
| IGHV3         | 87           | 63,0         |
| IGHV4         | 37           | 26,8         |
| IGHV5         | 2            | 1,4          |
| IGHV6         | 1            | 0,7          |
| IGHV7         | 0            | 0,0          |
| <b>Totals</b> | <b>138</b>   | <b>100,0</b> |

| IGH subgroup  | Frequency, n | Frequency, % |
|---------------|--------------|--------------|
| IGHD1         | 12           | 9,6          |
| IGHD2         | 31           | 24,8         |
| IGHD3         | 46           | 36,8         |
| IGHD4         | 15           | 12,0         |
| IGHD5         | 5            | 4,0          |
| IGHD6         | 16           | 12,8         |
| IGHD7         | 0            | 0,0          |
| <b>Totals</b> | <b>125</b>   | <b>100,0</b> |

| IGH subgroup  | Frequency, n | Frequency, % |
|---------------|--------------|--------------|
| IGHJ1         | 1            | 0,8          |
| IGHJ2         | 3            | 2,4          |
| IGHJ3         | 15           | 11,9         |
| IGHJ4         | 60           | 47,6         |
| IGHJ5         | 22           | 17,5         |
| IGHJ6         | 25           | 19,8         |
| <b>Totals</b> | <b>126</b>   | <b>100,0</b> |

**IGHV subgroup**

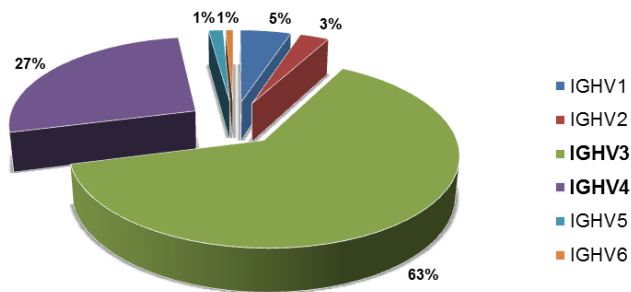

**IGHD subgroup**

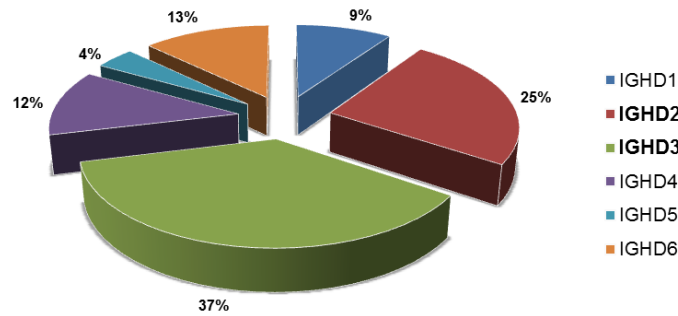

**IGHJ subgroup**

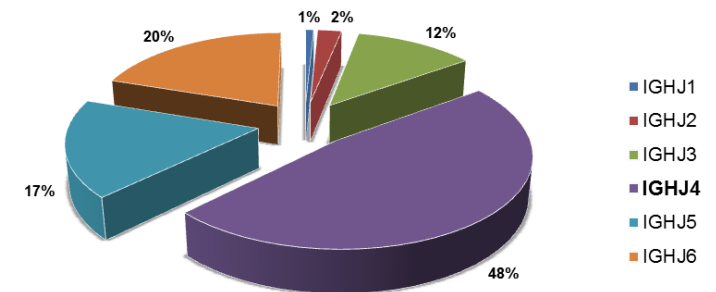

**Table S3.** IGHV gene repertoire of the present series.

| IGHV gene  | Frequency, n | Frequency, % | IGHV gene  | Frequency, n | Frequency, % | IGHV gene     | Frequency, n | Frequency, % |
|------------|--------------|--------------|------------|--------------|--------------|---------------|--------------|--------------|
| IGHV1-2    | 0            | 0,0          | IGHV3-30   | 13           | 9,4          | IGHV4-38-2    | 0            | 0,0          |
| IGHV1-3    | 0            | 0,0          | IGHV3-30-3 | 1            | 0,7          | IGHV4-39      | 6            | 4,3          |
| IGHV1-8    | 1            | 0,7          | IGHV3-30-5 | 0            | 0,0          | IGHV4-55      | 1            | 0,7          |
| IGHV1-18   | 2            | 1,4          | IGHV3-33   | 5            | 3,6          | IGHV4-59      | 1            | 0,7          |
| IGHV1-24   | 0            | 0,0          | IGHV3-43   | 0            | 0,0          | IGHV4-61      | 5            | 3,6          |
| IGHV1-45   | 0            | 0,0          | IGHV3-43D  | 0            | 0,0          | IGHV5-10-1    | 1            | 0,7          |
| IGHV1-46   | 1            | 0,7          | IGHV3-48   | 14           | 10,1         | IGHV5-51      | 1            | 0,7          |
| IGHV1-58   | 0            | 0,0          | IGHV3-49   | 0            | 0,0          | IGHV6-1       | 1            | 0,7          |
| IGHV1-69   | 3            | 2,2          | IGHV3-53   | 2            | 1,4          | IGHV7-4-1     | 0            | 0,0          |
| IGHV1-69-2 | 0            | 0,0          | IGHV3-64   | 2            | 1,4          | <b>Totals</b> | <b>138</b>   | <b>100,0</b> |
| IGHV1-69D  | 0            | 0,0          | IGHV3-64D  | 0            | 0,0          |               |              |              |
| IGHV2-5    | 2            | 1,4          | IGHV3-66   | 1            | 0,7          |               |              |              |
| IGHV2-26   | 1            | 0,7          | IGHV3-72   | 1            | 0,7          |               |              |              |
| IGHV2-70   | 1            | 0,7          | IGHV3-73   | 2            | 1,4          |               |              |              |
| IGHV2-70D  | 0            | 0,0          | IGHV3-74   | 2            | 1,4          |               |              |              |
| IGHV3-7    | 6            | 4,3          | IGHV3-NL1  | 0            | 0,0          |               |              |              |
| IGHV3-9    | 0            | 0,0          | IGHV4-4    | 1            | 0,7          |               |              |              |
| IGHV3-11   | 3            | 2,2          | IGHV4-28   | 0            | 0,0          |               |              |              |
| IGHV3-13   | 1            | 0,7          | IGHV4-30   | 2            | 1,4          |               |              |              |
| IGHV3-15   | 4            | 2,9          | IGHV4-30-1 | 0            | 0,0          |               |              |              |
| IGHV3-20   | 1            | 0,7          | IGHV4-30-2 | 1            | 0,7          |               |              |              |
| IGHV3-21   | 10           | 7,2          | IGHV4-30-4 | 0            | 0,0          |               |              |              |
| IGHV3-23   | 19           | 13,8         | IGHV4-31   | 0            | 0,0          |               |              |              |
| IGHV3-23D  | 0            | 0,0          | IGHV4-34   | 20           | 14,5         |               |              |              |

### IGHV GENE REPERTOIRE (%)

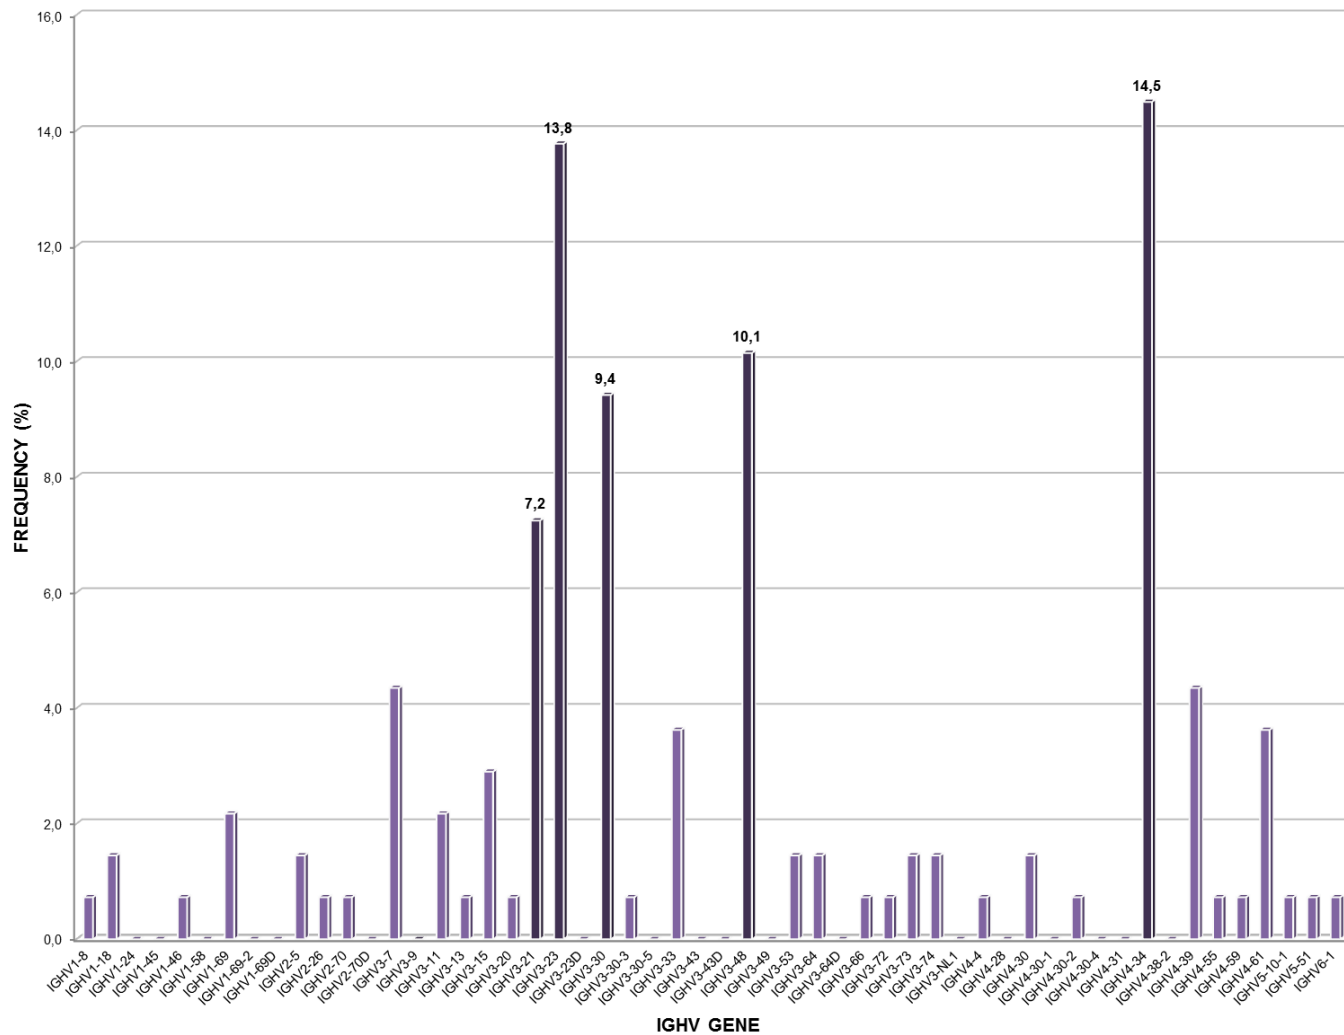

**Table S4.** IGHD gene repertoire of the present series.

| IGHD gene | Frequency, n | Frequency, % | IGHD gene     | Frequency, n | Frequency, % |
|-----------|--------------|--------------|---------------|--------------|--------------|
| IGHD1-1   | 4            | 3,2          | IGHD5-24      | 1            | 0,8          |
| IGHD1-7   | 1            | 0,8          | IGHD6-6       | 5            | 4,0          |
| IGHD1-14  | 0            | 0,0          | IGHD6-13      | 3            | 2,4          |
| IGHD1-20  | 3            | 2,4          | IGHD6-19      | 6            | 4,8          |
| IGHD1-26  | 4            | 3,2          | IGHD6-25      | 2            | 1,6          |
| IGHD2-2   | 9            | 7,2          | IGHD7-27      | 0            | 0,0          |
| IGHD2-8   | 4            | 3,2          | <b>Totals</b> | <b>125</b>   | <b>100,0</b> |
| IGHD2-15  | 8            | 6,4          |               |              |              |
| IGHD2-21  | 10           | 8,0          |               |              |              |
| IGHD3-3   | 6            | 4,8          |               |              |              |
| IGHD3-9   | 3            | 2,4          |               |              |              |
| IGHD3-10  | 15           | 12,0         |               |              |              |
| IGHD3-16  | 10           | 8,0          |               |              |              |
| IGHD3-22  | 12           | 9,6          |               |              |              |
| IGHD4-4   | 0            | 0,0          |               |              |              |
| IGHD4-11  | 5            | 4,0          |               |              |              |
| IGHD4-17  | 4            | 3,2          |               |              |              |
| IGHD4-23  | 6            | 4,8          |               |              |              |
| IGHD5-5   | 0            | 0,0          |               |              |              |
| IGHD5-12  | 3            | 2,4          |               |              |              |
| IGHD5-18  | 1            | 0,8          |               |              |              |

### IGHD GENE REPERTOIRE (%)

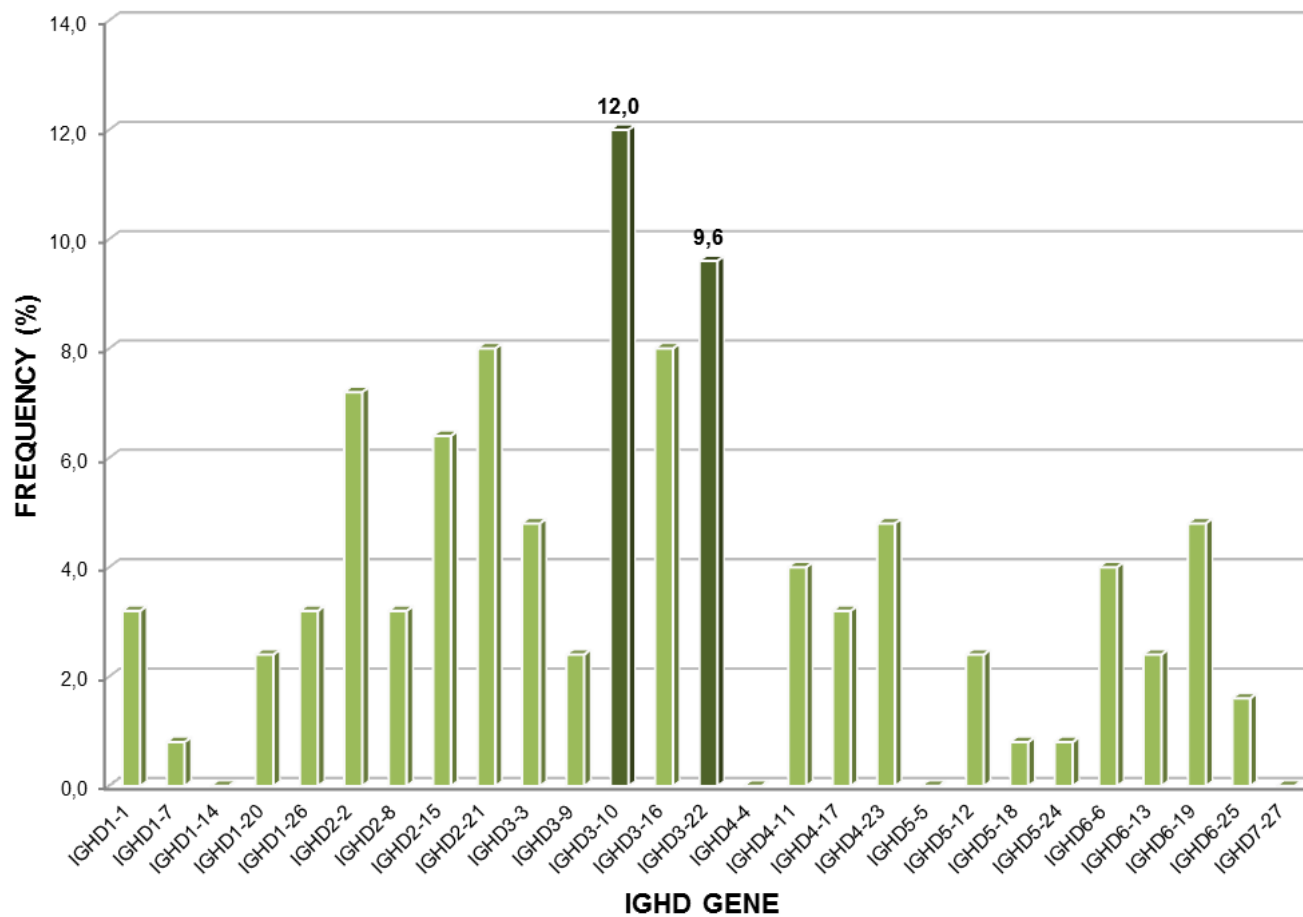



**Table S5.** VH CDR3 length distribution for the IGHV subgroup and most frequent IGHV gene in FL (n=113).

| VH CDR3 length | IGHV1       |              | IGHV2       |              | IGHV3       |              | IGHV4       |              | IGHV5       |              | IGHV6       |              |
|----------------|-------------|--------------|-------------|--------------|-------------|--------------|-------------|--------------|-------------|--------------|-------------|--------------|
|                | No          | %            | No          | %            | No          | %            | No          | %            | No          | %            | No          | %            |
| 8              | 0           | 0,0          | 0           | 0,0          | 1           | 1,4          | 0           | 0,0          | 0           | 0,0          | 0           | 0,0          |
| 9              | 0           | 0,0          | 0           | 0,0          | 1           | 1,4          | 0           | 0,0          | 0           | 0,0          | 0           | 0,0          |
| 10             | 0           | 0,0          | 0           | 0,0          | 4           | 5,6          | 1           | 3,1          | 0           | 0,0          | 0           | 0,0          |
| 11             | 2           | 50,0         | 0           | 0,0          | 5           | 7,0          | 0           | 0,0          | 0           | 0,0          | 0           | 0,0          |
| 12             | 0           | 0,0          | 0           | 0,0          | 5           | 7,0          | 0           | 0,0          | 0           | 0,0          | 0           | 0,0          |
| 13             | 0           | 0,0          | 0           | 0,0          | 5           | 7,0          | 3           | 9,4          | 1           | 100,0        | 0           | 0,0          |
| 14             | 0           | 0,0          | 1           | 25,0         | 4           | 5,6          | 4           | 12,5         | 0           | 0,0          | 0           | 0,0          |
| 15             | 0           | 0,0          | 0           | 0,0          | 7           | 9,9          | 3           | 9,4          | 0           | 0,0          | 0           | 0,0          |
| 16             | 0           | 0,0          | 0           | 0,0          | 11          | 15,5         | 11          | 34,4         | 0           | 0,0          | 0           | 0,0          |
| 17             | 0           | 0,0          | 1           | 25,0         | 10          | 14,1         | 3           | 9,4          | 0           | 0,0          | 0           | 0,0          |
| 18             | 1           | 25,0         | 0           | 0,0          | 3           | 4,2          | 1           | 3,1          | 0           | 0,0          | 1           | 100,0        |
| 19             | 0           | 0,0          | 0           | 0,0          | 3           | 4,2          | 2           | 6,3          | 0           | 0,0          | 0           | 0,0          |
| 20             | 0           | 0,0          | 0           | 0,0          | 4           | 5,6          | 1           | 3,1          | 0           | 0,0          | 0           | 0,0          |
| 21             | 0           | 0,0          | 0           | 0,0          | 1           | 1,4          | 1           | 3,1          | 0           | 0,0          | 0           | 0,0          |
| 22             | 0           | 0,0          | 0           | 0,0          | 1           | 1,4          | 0           | 0,0          | 0           | 0,0          | 0           | 0,0          |
| 23             | 0           | 0,0          | 2           | 50,0         | 0           | 0,0          | 0           | 0,0          | 0           | 0,0          | 0           | 0,0          |
| 25             | 0           | 0,0          | 0           | 0,0          | 2           | 2,8          | 0           | 0,0          | 0           | 0,0          | 0           | 0,0          |
| 26             | 1           | 25,0         | 0           | 0,0          | 1           | 1,4          | 1           | 3,1          | 0           | 0,0          | 0           | 0,0          |
| 27             | 0           | 0,0          | 0           | 0,0          | 1           | 1,4          | 1           | 3,1          | 0           | 0,0          | 0           | 0,0          |
| 28             | 0           | 0,0          | 0           | 0,0          | 2           | 2,8          | 0           | 0,0          | 0           | 0,0          | 0           | 0,0          |
| <b>Totals</b>  | <b>4</b>    | <b>100,0</b> | <b>4</b>    | <b>100,0</b> | <b>71</b>   | <b>100,0</b> | <b>32</b>   | <b>100,0</b> | <b>1</b>    | <b>100,0</b> | <b>1</b>    | <b>100,0</b> |
| <b>Mean</b>    | <b>16,5</b> |              | <b>19,3</b> |              | <b>16,0</b> |              | <b>16,5</b> |              | <b>13,0</b> |              | <b>18,0</b> |              |
| <b>Median</b>  | <b>14,5</b> |              | <b>20,0</b> |              | <b>16,0</b> |              | <b>16,0</b> |              | <b>13,0</b> |              | <b>18,0</b> |              |

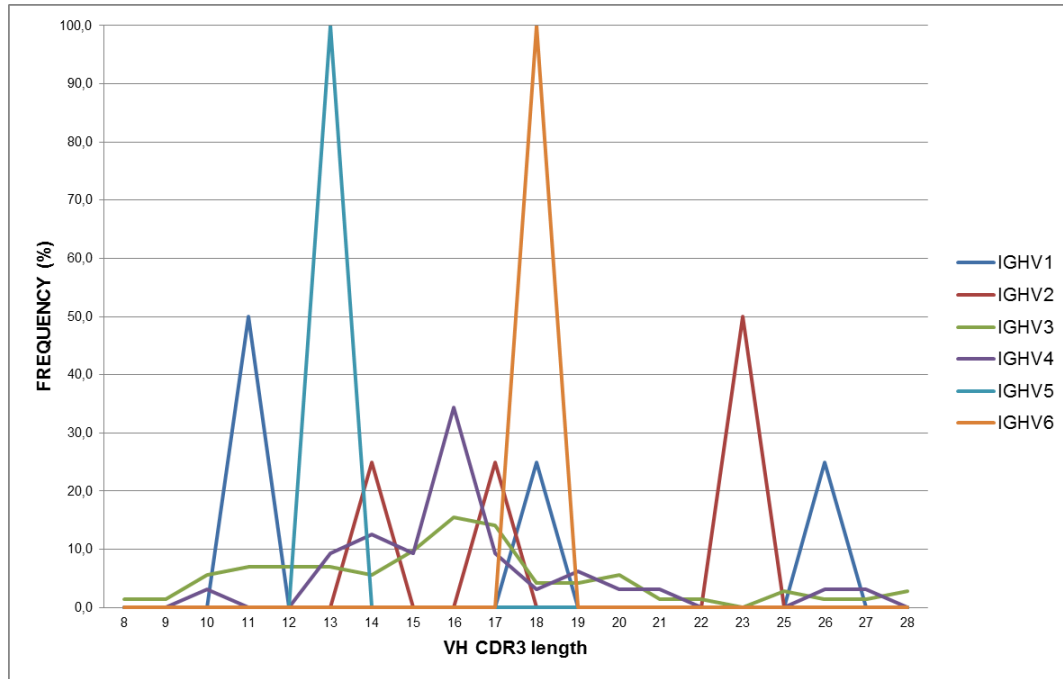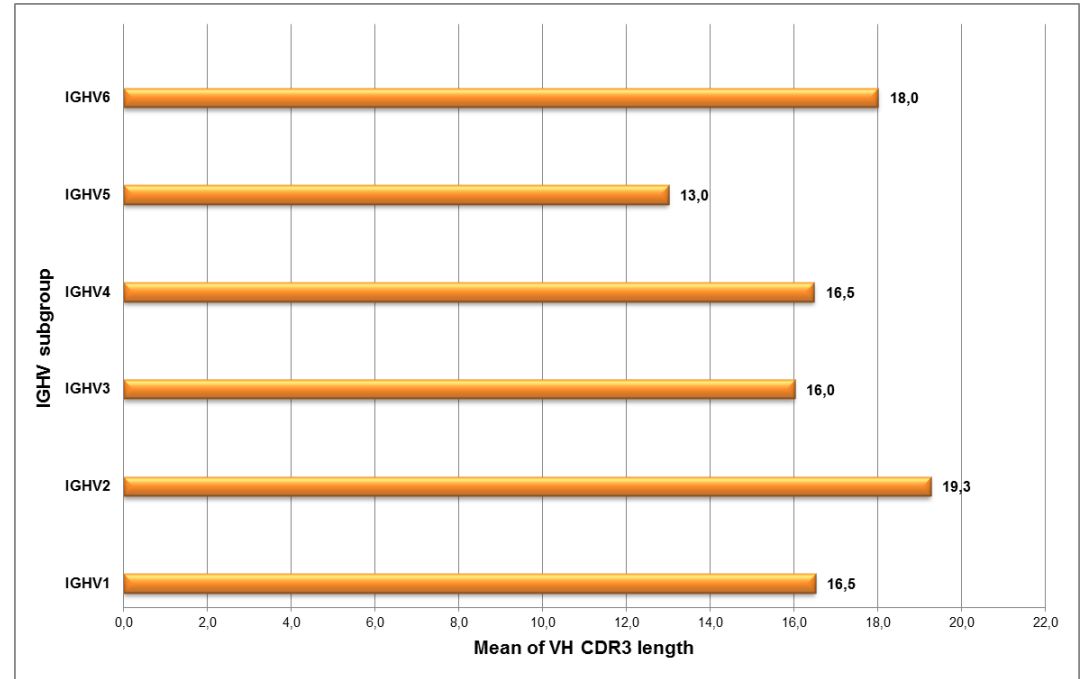

| VH CDR3 length | IGHV3-21    |       | IGHV3-23    |       | IGHV3-30    |       | IGHV3-48    |       | IGHV4-34    |       |
|----------------|-------------|-------|-------------|-------|-------------|-------|-------------|-------|-------------|-------|
|                | No          | %     | No          | %     | No          | %     | No          | %     | No          | %     |
| 8              | 0           | 0,0   | 0           | 0,0   | 0           | 0,0   | 0           | 0,0   | 0           | 0,0   |
| 9              | 0           | 0,0   | 1           | 6,7   | 0           | 0,0   | 0           | 0,0   | 0           | 0,0   |
| 10             | 1           | 16,7  | 0           | 0,0   | 0           | 0,0   | 1           | 8,3   | 1           | 5,3   |
| 11             | 2           | 33,3  | 0           | 0,0   | 0           | 0,0   | 0           | 0,0   | 0           | 0,0   |
| 12             | 0           | 0,0   | 1           | 6,7   | 1           | 10,0  | 0           | 0,0   | 0           | 0,0   |
| 13             | 0           | 0,0   | 1           | 6,7   | 0           | 0,0   | 2           | 16,7  | 1           | 5,3   |
| 14             | 1           | 16,7  | 1           | 6,7   | 1           | 10,0  | 1           | 8,3   | 3           | 15,8  |
| 15             | 0           | 0,0   | 4           | 26,7  | 1           | 10,0  | 0           | 0,0   | 1           | 5,3   |
| 16             | 1           | 16,7  | 2           | 13,3  | 1           | 10,0  | 2           | 16,7  | 7           | 36,8  |
| 17             | 0           | 0,0   | 2           | 13,3  | 2           | 20,0  | 2           | 16,7  | 2           | 10,5  |
| 18             | 0           | 0,0   | 1           | 6,7   | 0           | 0,0   | 0           | 0,0   | 1           | 5,3   |
| 19             | 0           | 0,0   | 1           | 6,7   | 0           | 0,0   | 2           | 16,7  | 1           | 5,3   |
| 20             | 1           | 16,7  | 0           | 0,0   | 1           | 10,0  | 2           | 16,7  | 0           | 0,0   |
| 21             | 0           | 0,0   | 0           | 0,0   | 0           | 0,0   | 0           | 0,0   | 1           | 5,3   |
| 22             | 0           | 0,0   | 0           | 0,0   | 0           | 0,0   | 0           | 0,0   | 0           | 0,0   |
| 23             | 0           | 0,0   | 0           | 0,0   | 0           | 0,0   | 0           | 0,0   | 0           | 0,0   |
| 25             | 0           | 0,0   | 0           | 0,0   | 2           | 20,0  | 0           | 0,0   | 0           | 0,0   |
| 26             | 0           | 0,0   | 1           | 6,7   | 0           | 0,0   | 0           | 0,0   | 0           | 0,0   |
| 27             | 0           | 0,0   | 0           | 0,0   | 0           | 0,0   | 0           | 0,0   | 1           | 5,3   |
| 28             | 0           | 0,0   | 0           | 0,0   | 1           | 10,0  | 0           | 0,0   | 0           | 0,0   |
| <b>Totals</b>  | <b>6</b>    | 100,0 | <b>15</b>   | 100,0 | <b>10</b>   | 100,0 | <b>12</b>   | 100,0 | <b>19</b>   | 100,0 |
| <b>Mean</b>    | <b>13,7</b> |       | <b>15,8</b> |       | <b>18,9</b> |       | <b>16,2</b> |       | <b>16,4</b> |       |
| <b>Median</b>  | <b>12,5</b> |       | <b>15,0</b> |       | <b>17,0</b> |       | <b>15,5</b> |       | <b>16,0</b> |       |



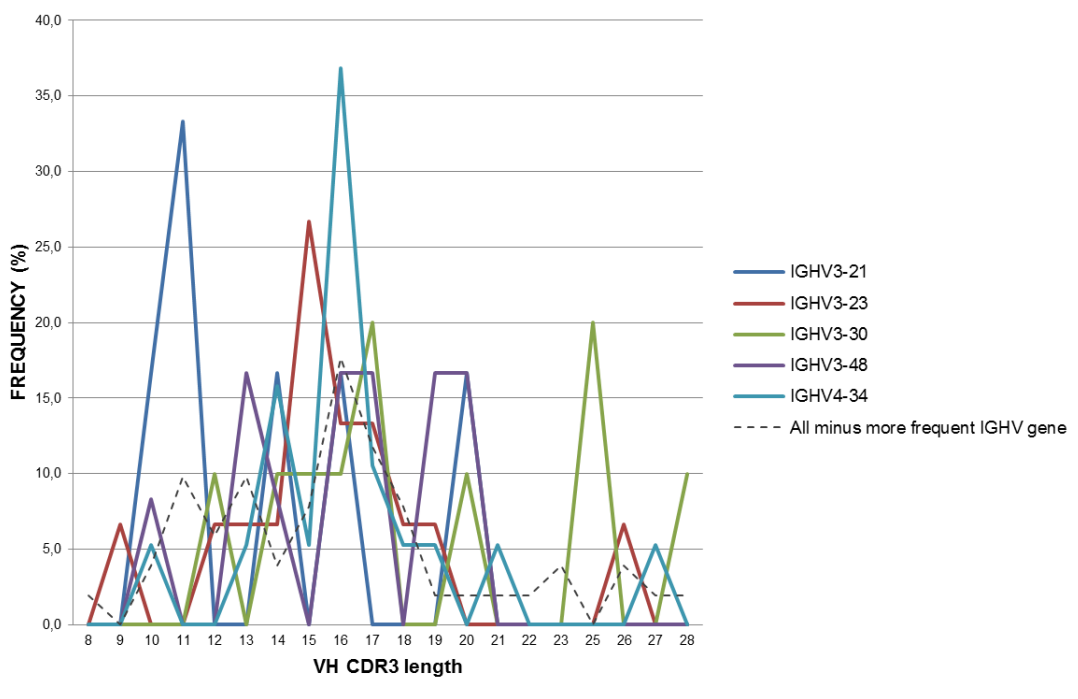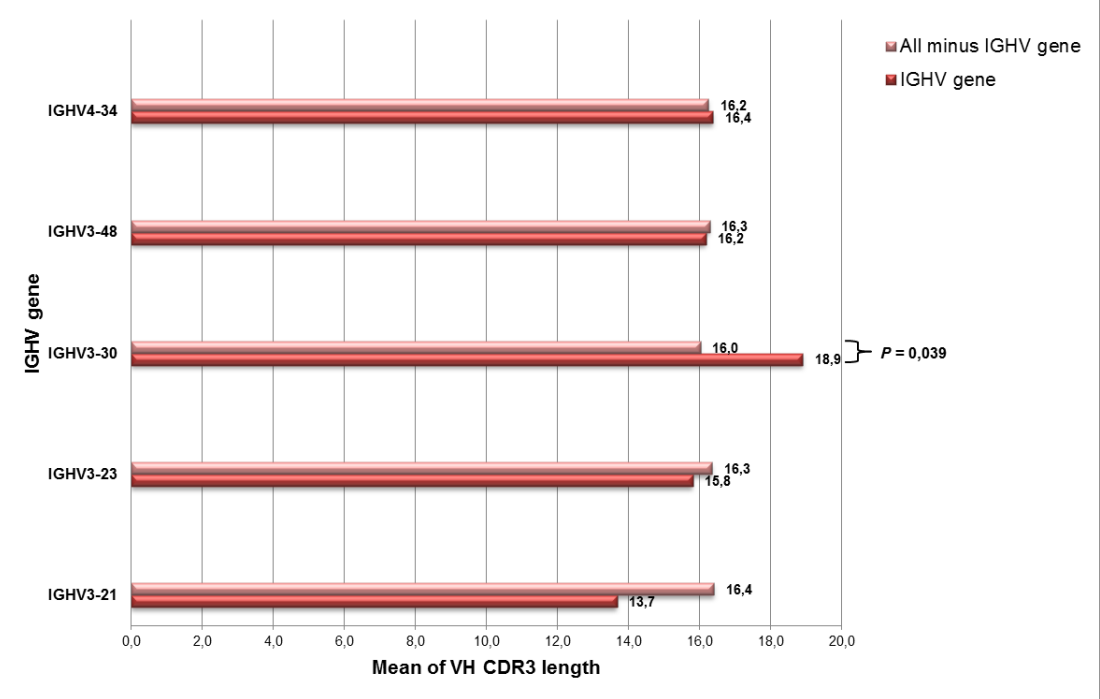



**Table S7.** Frequencies of IGHV, IGHD and IGHJ subgroups in the clonal V-D-J rearrangements of transformed follicular lymphoma (tFL).

| IGH subgroup  | Frequency, n | Frequency, % |
|---------------|--------------|--------------|
| IGHV1         | 1            | 3,2          |
| IGHV2         | 0            | 0,0          |
| IGHV3         | 23           | 74,2         |
| IGHV4         | 6            | 19,4         |
| IGHV5         | 1            | 3,2          |
| IGHV6         | 0            | 0,0          |
| IGHV7         | 0            | 0,0          |
| <b>Totals</b> | <b>31</b>    | <b>100,0</b> |

| IGH subgroup  | Frequency, n | Frequency, % |
|---------------|--------------|--------------|
| IGHD1         | 3            | 12,0         |
| IGHD2         | 8            | 32,0         |
| IGHD3         | 8            | 32,0         |
| IGHD4         | 2            | 8,0          |
| IGHD5         | 0            | 0,0          |
| IGHD6         | 4            | 16,0         |
| IGHD7         | 0            | 0,0          |
| <b>Totals</b> | <b>25</b>    | <b>100,0</b> |

| IGH subgroup  | Frequency, n | Frequency, % |
|---------------|--------------|--------------|
| IGHJ1         | 0            | 0,0          |
| IGHJ2         | 1            | 3,8          |
| IGHJ3         | 3            | 11,5         |
| IGHJ4         | 12           | 46,2         |
| IGHJ5         | 4            | 15,4         |
| IGHJ6         | 6            | 23,1         |
| <b>Totals</b> | <b>26</b>    | <b>100,0</b> |

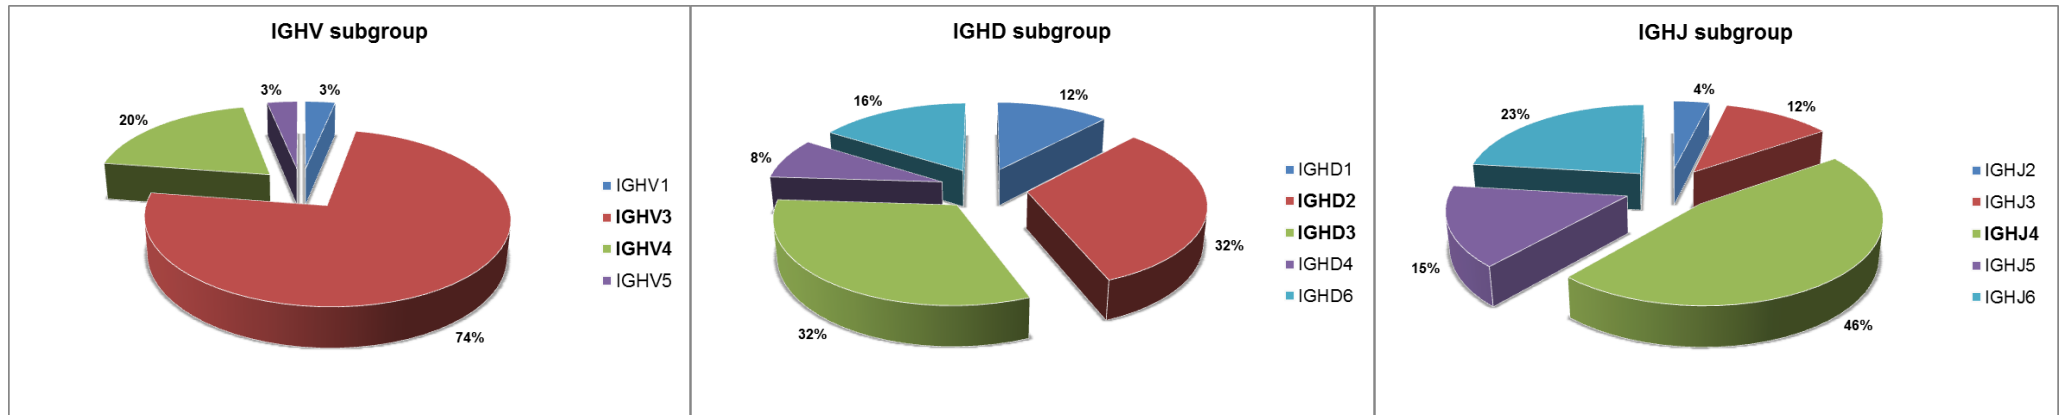

**Table S8.** IGHV gene repertoire of the tFL series.

| IGHV gene  | Frequency, n | Frequency, % | IGHV gene  | Frequency, n | Frequency, % | IGHV gene     | Frequency, n | Frequency, % |
|------------|--------------|--------------|------------|--------------|--------------|---------------|--------------|--------------|
| IGHV1-2    | 0            | 0,0          | IGHV3-30   | 4            | 12,9         | IGHV4-38-2    | 0            | 0,0          |
| IGHV1-3    | 0            | 0,0          | IGHV3-30-3 | 0            | 0,0          | IGHV4-39      | 1            | 3,2          |
| IGHV1-8    | 0            | 0,0          | IGHV3-30-5 | 0            | 0,0          | IGHV4-55      | 0            | 0,0          |
| IGHV1-18   | 0            | 0,0          | IGHV3-33   | 0            | 0,0          | IGHV4-59      | 0            | 0,0          |
| IGHV1-24   | 0            | 0,0          | IGHV3-43   | 0            | 0,0          | IGHV4-61      | 0            | 0,0          |
| IGHV1-45   | 0            | 0,0          | IGHV3-43D  | 0            | 0,0          | IGHV5-10-1    | 0            | 0,0          |
| IGHV1-46   | 0            | 0,0          | IGHV3-48   | 6            | 19,4         | IGHV5-51      | 1            | 3,2          |
| IGHV1-58   | 0            | 0,0          | IGHV3-49   | 0            | 0,0          | IGHV6-1       | 0            | 0,0          |
| IGHV1-69   | 1            | 3,2          | IGHV3-53   | 0            | 0,0          | IGHV7-4-1     | 0            | 0,0          |
| IGHV1-69-2 | 0            | 0,0          | IGHV3-64   | 0            | 0,0          | <b>Totals</b> | <b>31</b>    | <b>100,0</b> |
| IGHV1-69D  | 0            | 0,0          | IGHV3-64D  | 0            | 0,0          |               |              |              |
| IGHV2-5    | 0            | 0,0          | IGHV3-66   | 0            | 0,0          |               |              |              |
| IGHV2-26   | 0            | 0,0          | IGHV3-72   | 0            | 0,0          |               |              |              |
| IGHV2-70   | 0            | 0,0          | IGHV3-73   | 1            | 3,2          |               |              |              |
| IGHV2-70D  | 0            | 0,0          | IGHV3-74   | 1            | 3,2          |               |              |              |
| IGHV3-7    | 1            | 3,2          | IGHV3-NL1  | 0            | 0,0          |               |              |              |
| IGHV3-9    | 0            | 0,0          | IGHV4-4    | 0            | 0,0          |               |              |              |
| IGHV3-11   | 0            | 0,0          | IGHV4-28   | 0            | 0,0          |               |              |              |
| IGHV3-13   | 1            | 3,2          | IGHV4-30   | 0            | 0,0          |               |              |              |
| IGHV3-15   | 1            | 3,2          | IGHV4-30-1 | 0            | 0,0          |               |              |              |
| IGHV3-20   | 0            | 0,0          | IGHV4-30-2 | 0            | 0,0          |               |              |              |
| IGHV3-21   | 4            | 12,9         | IGHV4-30-4 | 0            | 0,0          |               |              |              |
| IGHV3-23   | 4            | 12,9         | IGHV4-31   | 0            | 0,0          |               |              |              |
| IGHV3-23D  | 0            | 0,0          | IGHV4-34   | 5            | 16,1         |               |              |              |



IGHV GENE REPERTOIRE (%)

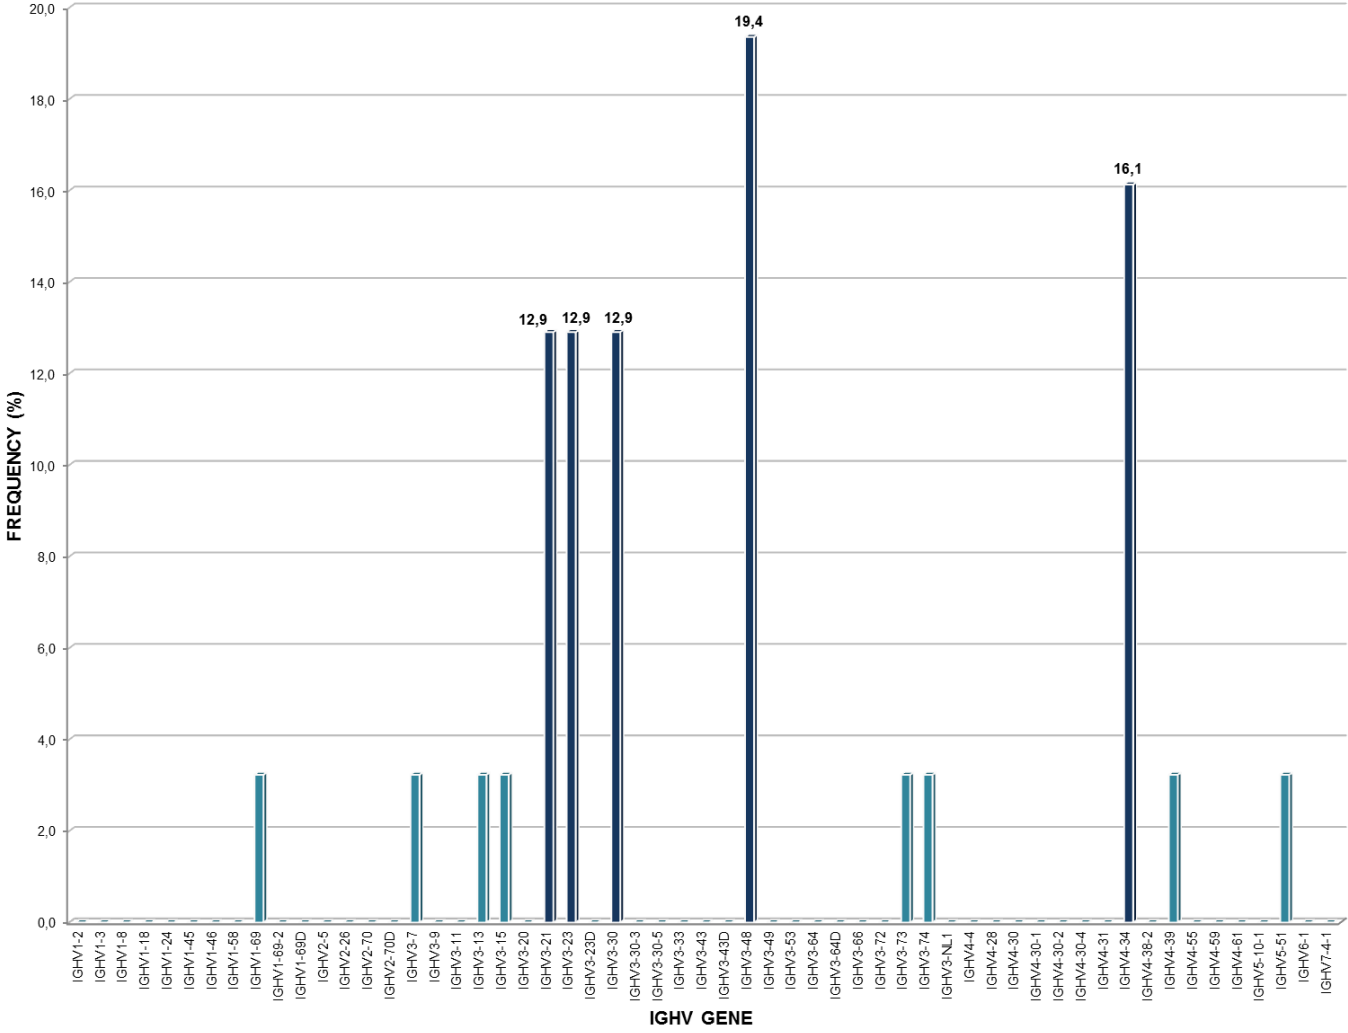

**Table S9.** IGHD gene repertoire of the tFL series.

| IGHD gene | Frequency, n | Frequency, % | IGHD gene     | Frequency, n | Frequency, % |
|-----------|--------------|--------------|---------------|--------------|--------------|
| IGHD1-1   | 0            | 0,0          | IGHD6-6       | 1            | 4,0          |
| IGHD1-7   | 0            | 0,0          | IGHD6-13      | 1            | 4,0          |
| IGHD1-14  | 0            | 0,0          | IGHD6-19      | 0            | 0,0          |
| IGHD1-20  | 1            | 4,0          | IGHD6-25      | 2            | 8,0          |
| IGHD1-26  | 2            | 8,0          | IGHD7-27      | 0            | 0,0          |
| IGHD2-2   | 3            | 12,0         | <b>Totals</b> | <b>25</b>    | <b>100,0</b> |
| IGHD2-8   | 0            | 0,0          |               |              |              |
| IGHD2-15  | 2            | 8,0          |               |              |              |
| IGHD2-21  | 3            | 12,0         |               |              |              |
| IGHD3-3   | 0            | 0,0          |               |              |              |
| IGHD3-9   | 1            | 4,0          |               |              |              |
| IGHD3-10  | 3            | 12,0         |               |              |              |
| IGHD3-16  | 1            | 4,0          |               |              |              |
| IGHD3-22  | 3            | 12,0         |               |              |              |
| IGHD4-4   | 0            | 0,0          |               |              |              |
| IGHD4-11  | 1            | 4,0          |               |              |              |
| IGHD4-17  | 0            | 0,0          |               |              |              |
| IGHD4-23  | 1            | 4,0          |               |              |              |
| IGHD5-5   | 0            | 0,0          |               |              |              |
| IGHD5-12  | 0            | 0,0          |               |              |              |
| IGHD5-18  | 0            | 0,0          |               |              |              |
| IGHD5-24  | 0            | 0,0          |               |              |              |

### IGHD GENE REPERTOIRE (%)

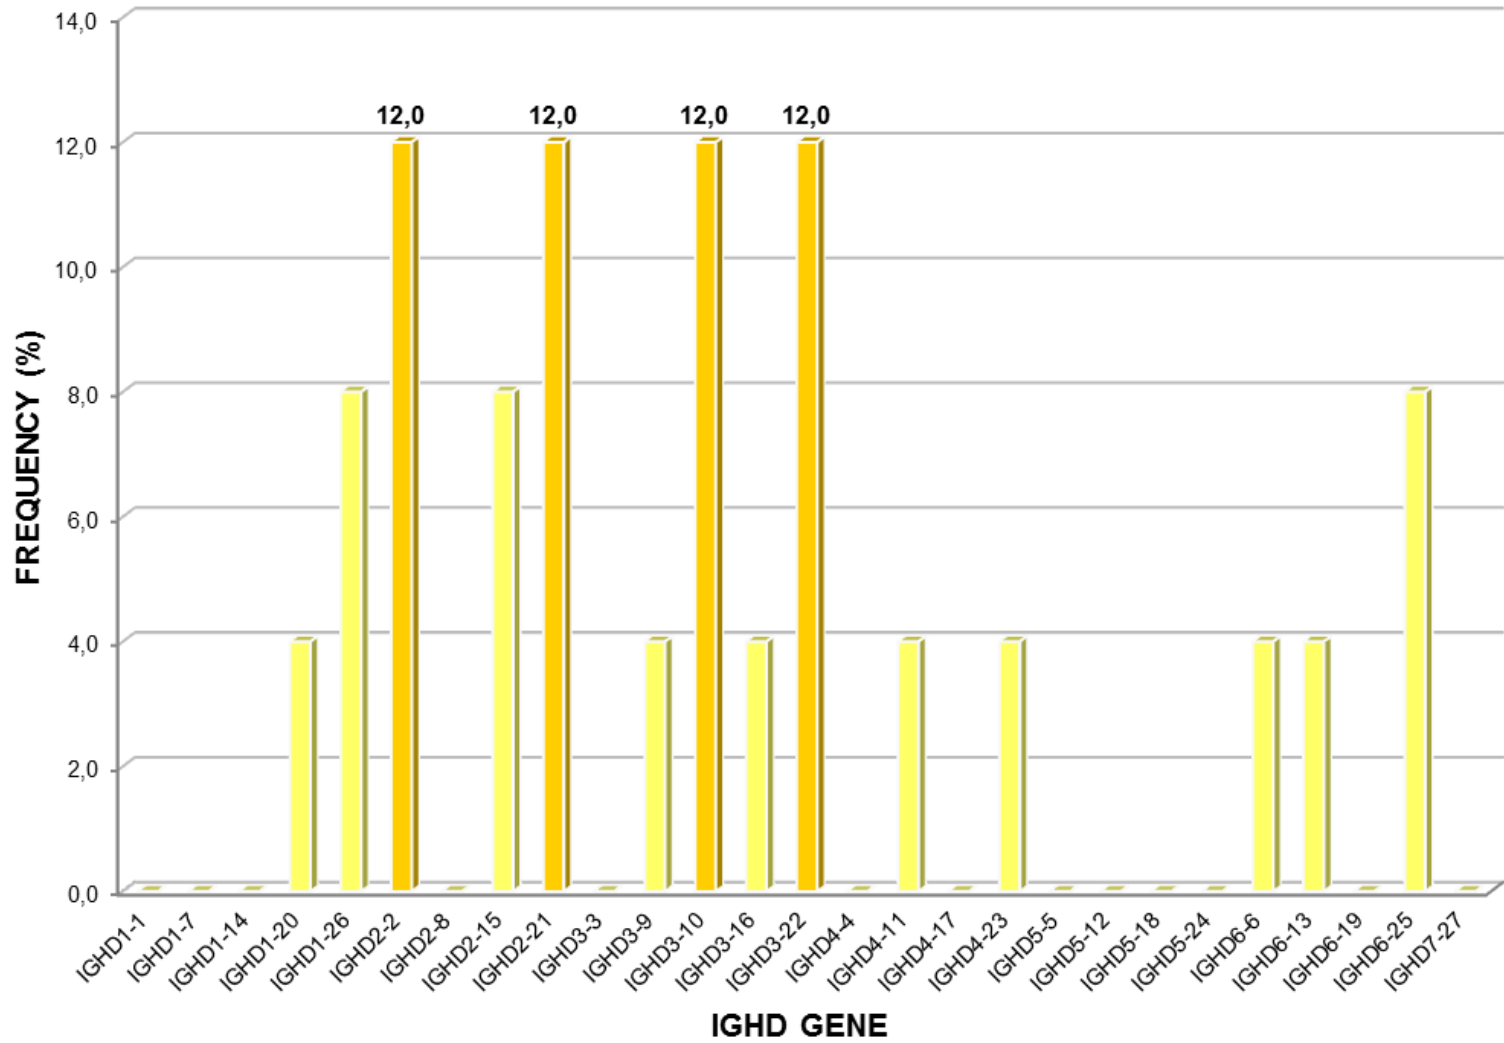

**Table S10.** Comparative analysis of the IGHV usage in tFL with FL and GCB/non-GCB DLBCL.

| IGH         | tFL (n=31) |      | FL (n=63) |      | P      | GCB DLBCL (n=32) <sup>1</sup> |      | P      | non-GCB DLBCL (n=48) <sup>1</sup> |      | P      |
|-------------|------------|------|-----------|------|--------|-------------------------------|------|--------|-----------------------------------|------|--------|
|             | n          | %    | n         | %    |        | n                             | %    |        | n                                 | %    |        |
| <b>IGHV</b> |            |      |           |      |        |                               |      |        |                                   |      |        |
| 1           | 1          | 3,2  | 3         | 4,8  | 1,0000 | 4                             | 12,5 | 0,3540 | 11                                | 22,9 | 0,0245 |
| 2           | 0          | 0,0  | 2         | 3,2  | 1,0000 | 1                             | 3,1  | 0,4918 | 1                                 | 2,1  | 1,0000 |
| 3           | 23         | 74,2 | 40        | 63,5 | 0,3560 | 19                            | 59,4 | 0,2831 | 19                                | 39,6 | 0,0027 |
| 4           | 6          | 19,4 | 17        | 27,0 | 0,4580 | 6                             | 18,8 | 1,0000 | 15                                | 31,3 | 0,1373 |
| 5           | 1          | 3,2  | 0         | 0,0  | 0,3298 | 1                             | 3,1  | 1,0000 | 2                                 | 4,2  | 1,0000 |
| 6           | 0          | 0,0  | 1         | 1,6  | 1,0000 | 1                             | 3,1  | 0,4918 | 0                                 | 0,0  | 1,0000 |
| 7           | 0          | 0,0  | 0         | 0,0  | 1,0000 | 0                             | 0,0  | 1,0000 | 0                                 | 0,0  | 1,0000 |
| 3-21        | 4          | 12,9 | 5         | 7,9  | 0,4710 | 2                             | 6,3  | 0,6713 | 1                                 | 2,1  | 0,0680 |
| 3-23        | 4          | 12,9 | 8         | 12,7 | 1,0000 | 3                             | 9,4  | 1,0000 | 6                                 | 12,5 | 1,0000 |
| 3-30        | 4          | 12,9 | 9         | 14,3 | 1,0000 | 0                             | 0,0  | 0,1128 | 0                                 | 0,0  | 0,0189 |
| 3-48        | 6          | 19,4 | 3         | 4,8  | 0,0551 | 2                             | 6,3  | 0,2554 | 2                                 | 4,2  | 0,0491 |
| 4-34        | 5          | 16,1 | 8         | 12,7 | 0,7528 | 0                             | 0,0  | 0,0525 | 12                                | 25,0 | 0,2853 |

**References:** 1-Diffuse Large B-Cell Lymphoma, Sebastian et al, American Journal of Pathology 2012

**Table S11.** Comparison of the IGHV gene usage in tFL with FL and GCB/non-GCB DLBCL.

| tFL        |              |              | FL         |              |              | GCB DLBCL <sup>1</sup> |              |              | non-GCB DLBCL <sup>1</sup> |              |              |
|------------|--------------|--------------|------------|--------------|--------------|------------------------|--------------|--------------|----------------------------|--------------|--------------|
| IGHV gene  | Frequency, n | Frequency, % | IGHV gene  | Frequency, n | Frequency, % | IGHV gene              | Frequency, n | Frequency, % | IGHV gene                  | Frequency, n | Frequency, % |
| IGHV1-2    | 0            | 0,0          | IGHV1-2    | 0            | 0,0          | IGHV1-2                | 0            | 0,0          | IGHV1-2                    | 3            | 6,3          |
| IGHV1-3    | 0            | 0,0          | IGHV1-3    | 0            | 0,0          | IGHV1-3                | 0            | 0,0          | IGHV1-3                    | 1            | 2,1          |
| IGHV1-8    | 0            | 0,0          | IGHV1-8    | 1            | 1,6          | IGHV1-8                | 1            | 3,1          | IGHV1-8                    | 1            | 2,1          |
| IGHV1-18   | 0            | 0,0          | IGHV1-18   | 0            | 0,0          | IGHV1-18               | 1            | 3,1          | IGHV1-18                   | 2            | 4,2          |
| IGHV1-24   | 0            | 0,0          | IGHV1-24   | 0            | 0,0          | IGHV1-24               | 0            | 0,0          | IGHV1-24                   | 0            | 0,0          |
| IGHV1-45   | 0            | 0,0          | IGHV1-45   | 0            | 0,0          | IGHV1-45               | 0            | 0,0          | IGHV1-45                   | 0            | 0,0          |
| IGHV1-46   | 0            | 0,0          | IGHV1-46   | 1            | 1,6          | IGHV1-46               | 1            | 3,1          | IGHV1-46                   | 1            | 2,1          |
| IGHV1-58   | 0            | 0,0          | IGHV1-58   | 0            | 0,0          | IGHV1-58               | 0            | 0,0          | IGHV1-58                   | 0            | 0,0          |
| IGHV1-69   | 1            | 3,2          | IGHV1-69   | 1            | 1,6          | IGHV1-69               | 1            | 3,1          | IGHV1-69                   | 3            | 6,3          |
| IGHV1-69-2 | 0            | 0,0          | IGHV1-69-2 | 0            | 0,0          | IGHV1-69-2             | 0            | 0,0          | IGHV1-69-2                 | 0            | 0,0          |
| IGHV1-69D  | 0            | 0,0          | IGHV1-69D  | 0            | 0,0          | IGHV1-69D              | 0            | 0,0          | IGHV1-69D                  | 0            | 0,0          |
| IGHV2-5    | 0            | 0,0          | IGHV2-5    | 1            | 1,6          | IGHV2-5                | 1            | 3,1          | IGHV2-5                    | 1            | 2,1          |
| IGHV2-26   | 0            | 0,0          | IGHV2-26   | 0            | 0,0          | IGHV2-26               | 0            | 0,0          | IGHV2-26                   | 0            | 0,0          |
| IGHV2-70   | 0            | 0,0          | IGHV2-70   | 1            | 1,6          | IGHV2-70               | 0            | 0,0          | IGHV2-70                   | 0            | 0,0          |
| IGHV2-70D  | 0            | 0,0          | IGHV2-70D  | 0            | 0,0          | IGHV2-70D              | 0            | 0,0          | IGHV2-70D                  | 0            | 0,0          |
| IGHV3-7    | 1            | 3,2          | IGHV3-7    | 4            | 6,3          | IGHV3-7                | 2            | 6,3          | IGHV3-7                    | 2            | 4,2          |
| IGHV3-9    | 0            | 0,0          | IGHV3-9    | 0            | 0,0          | IGHV3-9                | 0            | 0,0          | IGHV3-9                    | 2            | 4,2          |
| IGHV3-11   | 0            | 0,0          | IGHV3-11   | 3            | 4,8          | IGHV3-11               | 2            | 6,3          | IGHV3-11                   | 0            | 0,0          |
| IGHV3-13   | 1            | 3,2          | IGHV3-13   | 0            | 0,0          | IGHV3-13               | 1            | 3,1          | IGHV3-13                   | 0            | 0,0          |
| IGHV3-15   | 1            | 3,2          | IGHV3-15   | 2            | 3,2          | IGHV3-15               | 0            | 0,0          | IGHV3-15                   | 1            | 2,1          |
| IGHV3-20   | 0            | 0,0          | IGHV3-20   | 1            | 1,6          | IGHV3-20               | 1            | 3,1          | IGHV3-20                   | 0            | 0,0          |
| IGHV3-21   | 4            | 12,9         | IGHV3-21   | 5            | 7,9          | IGHV3-21               | 2            | 6,3          | IGHV3-21                   | 1            | 2,1          |

|            |   |      |            |   |      |            |   |     |            |    |      |
|------------|---|------|------------|---|------|------------|---|-----|------------|----|------|
| IGHV3-23   | 4 | 12,9 | IGHV3-23   | 8 | 12,7 | IGHV3-23   | 3 | 9,4 | IGHV3-23   | 6  | 12,5 |
| IGHV3-23D  | 0 | 0,0  | IGHV3-23D  | 0 | 0,0  | IGHV3-23D  | 0 | 0,0 | IGHV3-23D  | 0  | 0,0  |
| IGHV3-30   | 4 | 12,9 | IGHV3-30   | 9 | 14,3 | IGHV3-30   | 0 | 0,0 | IGHV3-30   | 0  | 0,0  |
| IGHV3-30-3 | 0 | 0,0  | IGHV3-30-3 | 0 | 0,0  | IGHV3-30-3 | 0 | 0,0 | IGHV3-30-3 | 0  | 0,0  |
| IGHV3-30-5 | 0 | 0,0  | IGHV3-30-5 | 0 | 0,0  | IGHV3-30-5 | 0 | 0,0 | IGHV3-30-5 | 0  | 0,0  |
| IGHV3-33   | 0 | 0,0  | IGHV3-33   | 4 | 6,3  | IGHV3-33   | 3 | 9,4 | IGHV3-33   | 0  | 0,0  |
| IGHV3-43   | 0 | 0,0  | IGHV3-43   | 0 | 0,0  | IGHV3-43   | 0 | 0,0 | IGHV3-43   | 0  | 0,0  |
| IGHV3-43D  | 0 | 0,0  | IGHV3-43D  | 0 | 0,0  | IGHV3-43D  | 0 | 0,0 | IGHV3-43D  | 0  | 0,0  |
| IGHV3-48   | 6 | 19,4 | IGHV3-48   | 3 | 4,8  | IGHV3-48   | 2 | 6,3 | IGHV3-48   | 2  | 4,2  |
| IGHV3-49   | 0 | 0,0  | IGHV3-49   | 0 | 0,0  | IGHV3-49   | 0 | 0,0 | IGHV3-49   | 0  | 0,0  |
| IGHV3-53   | 0 | 0,0  | IGHV3-53   | 1 | 1,6  | IGHV3-53   | 2 | 6,3 | IGHV3-53   | 4  | 8,3  |
| IGHV3-64   | 0 | 0,0  | IGHV3-64   | 0 | 0,0  | IGHV3-64   | 0 | 0,0 | IGHV3-64   | 0  | 0,0  |
| IGHV3-64D  | 0 | 0,0  | IGHV3-64D  | 0 | 0,0  | IGHV3-64D  | 0 | 0,0 | IGHV3-64D  | 0  | 0,0  |
| IGHV3-66   | 0 | 0,0  | IGHV3-66   | 0 | 0,0  | IGHV3-66   | 0 | 0,0 | IGHV3-66   | 0  | 0,0  |
| IGHV3-72   | 0 | 0,0  | IGHV3-72   | 0 | 0,0  | IGHV3-72   | 0 | 0,0 | IGHV3-72   | 0  | 0,0  |
| IGHV3-73   | 1 | 3,2  | IGHV3-73   | 0 | 0,0  | IGHV3-73   | 0 | 0,0 | IGHV3-73   | 0  | 0,0  |
| IGHV3-74   | 1 | 3,2  | IGHV3-74   | 0 | 0,0  | IGHV3-74   | 1 | 3,1 | IGHV3-74   | 0  | 0,0  |
| IGHV3-NL1  | 0 | 0,0  | IGHV3-NL1  | 0 | 0,0  | IGHV3-NL1  | 0 | 0,0 | IGHV3-NL1  | 0  | 0,0  |
| IGHV4-4    | 0 | 0,0  | IGHV4-4    | 0 | 0,0  | IGHV4-4    | 0 | 0,0 | IGHV4-4    | 0  | 0,0  |
| IGHV4-28   | 0 | 0,0  | IGHV4-28   | 0 | 0,0  | IGHV4-28   | 1 | 3,1 | IGHV4-28   | 0  | 0,0  |
| IGHV4-30   | 0 | 0,0  | IGHV4-30   | 1 | 1,6  | IGHV4-30   | 0 | 0,0 | IGHV4-30   | 0  | 0,0  |
| IGHV4-30-1 | 0 | 0,0  | IGHV4-30-1 | 0 | 0,0  | IGHV4-30-1 | 0 | 0,0 | IGHV4-30-1 | 0  | 0,0  |
| IGHV4-30-2 | 0 | 0,0  | IGHV4-30-2 | 0 | 0,0  | IGHV4-30-2 | 0 | 0,0 | IGHV4-30-2 | 0  | 0,0  |
| IGHV4-30-4 | 0 | 0,0  | IGHV4-30-4 | 0 | 0,0  | IGHV4-30-4 | 0 | 0,0 | IGHV4-30-4 | 0  | 0,0  |
| IGHV4-31   | 0 | 0,0  | IGHV4-31   | 0 | 0,0  | IGHV4-31   | 0 | 0,0 | IGHV4-31   | 0  | 0,0  |
| IGHV4-34   | 5 | 16,1 | IGHV4-34   | 8 | 12,7 | IGHV4-34   | 0 | 0,0 | IGHV4-34   | 12 | 25,0 |
| IGHV4-38-2 | 0 | 0,0  | IGHV4-38-2 | 0 | 0,0  | IGHV4-38-2 | 0 | 0,0 | IGHV4-38-2 | 0  | 0,0  |

|               |           |              |               |           |              |               |           |              |               |           |              |
|---------------|-----------|--------------|---------------|-----------|--------------|---------------|-----------|--------------|---------------|-----------|--------------|
| IGHV4-39      | 1         | 3,2          | IGHV4-39      | 3         | 4,8          | IGHV4-39      | 3         | 9,4          | IGHV4-39      | 2         | 4,2          |
| IGHV4-55      | 0         | 0,0          | IGHV4-55      | 1         | 1,6          | IGHV4-55      | 0         | 0,0          | IGHV4-55      | 0         | 0,0          |
| IGHV4-59      | 0         | 0,0          | IGHV4-59      | 1         | 1,6          | IGHV4-59      | 1         | 3,1          | IGHV4-59      | 1         | 2,1          |
| IGHV4-61      | 0         | 0,0          | IGHV4-61      | 3         | 4,8          | IGHV4-61      | 1         | 3,1          | IGHV4-61      | 1         | 2,1          |
| IGHV5-1       | 0         | 0,0          | IGHV5-1       | 0         | 0,0          | IGHV5-1       | 0         | 0,0          | IGHV5-1       | 1         | 2,1          |
| IGHV5-10-1    | 0         | 0,0          | IGHV5-10-1    | 0         | 0,0          | IGHV5-10-1    | 0         | 0,0          | IGHV5-10-1    | 0         | 0,0          |
| IGHV5-51      | 1         | 3,2          | IGHV5-51      | 0         | 0,0          | IGHV5-51      | 1         | 3,1          | IGHV5-51      | 1         | 2,1          |
| IGHV6-1       | 0         | 0,0          | IGHV6-1       | 1         | 1,6          | IGHV6-1       | 1         | 3,1          | IGHV6-1       | 0         | 0,0          |
| IGHV7-4-1     | 0         | 0,0          | IGHV7-4-1     | 0         | 0,0          | IGHV7-4-1     | 0         | 0,0          | IGHV7-4-1     | 0         | 0,0          |
| <b>Totals</b> | <b>31</b> | <b>100,0</b> | <b>Totals</b> | <b>63</b> | <b>100,0</b> | <b>Totals</b> | <b>32</b> | <b>100,0</b> | <b>Totals</b> | <b>48</b> | <b>100,0</b> |

References: 1-Diffuse Large B-Cell Lymphoma, Sebastian et al, American Journal of Pathology 2012

IGHV GENE REPERTOIRE (%)

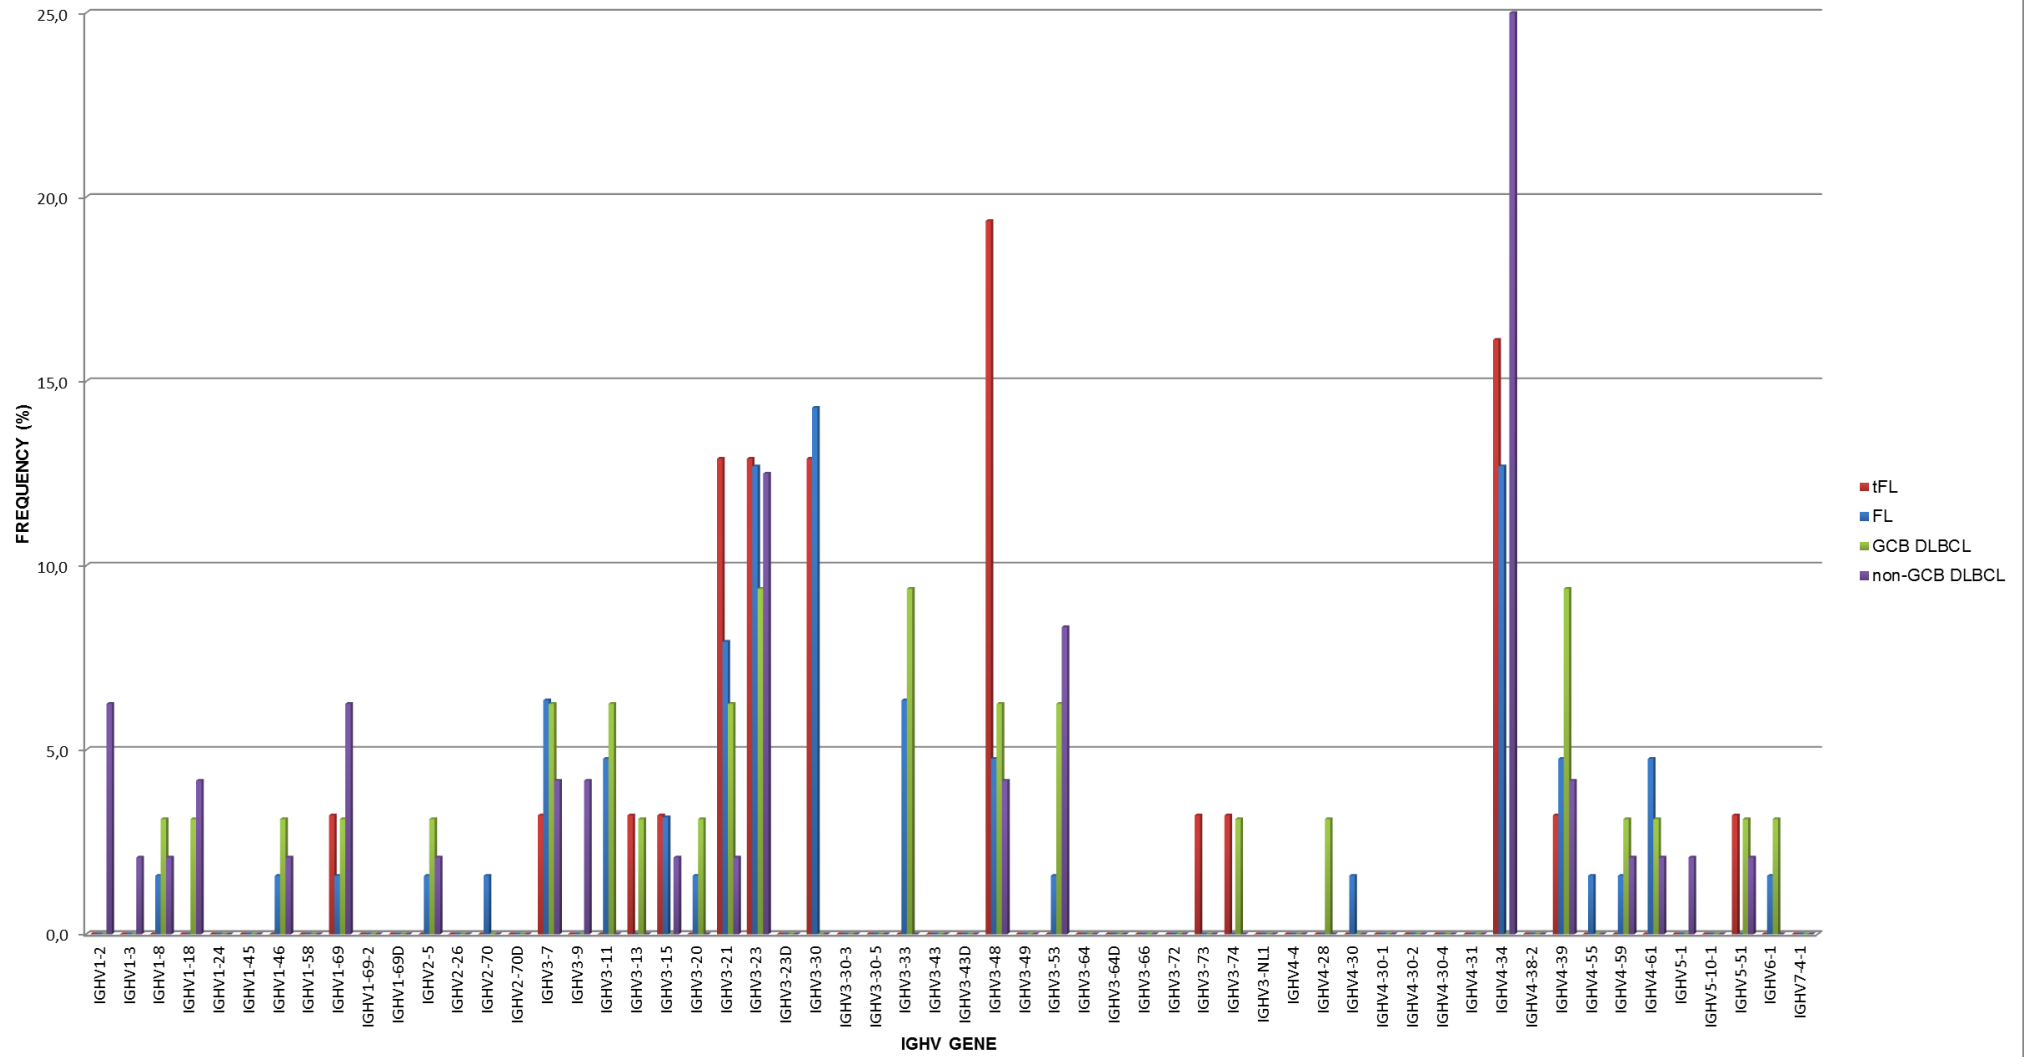

Supplement: 41408_2019_213_MOESM1_ESM.pdf [file 41408_2019_213_MOESM1_ESM.pdf]
